# Supplementary material
Source: Research Square preprint supplement (doi:10.21203/rs.3.rs-9271487/v1)
Supplement: Supplementary file 1 [file 5e3b009a9bb430b6ac8683ca.docx]

|  | **Adjusted OR** | **95% CI** | **p-value** |
| --- | --- | --- | --- |
| AIS | 6.393 | 3.787 – 10.793 | 0.001 |
| SIPA Score | 3.410 | 1.859 – 6.252 | 0.001 |
| ISS | 1.232 | 1.161 – 1.307 | 0.001 |
| BIG Score | 1.017 | 0.983 – 1.053 | 0.326 |
| Lactate | 1.158 | 1.029 – 1.301 | 0.014 |
| Base Deficit | 0.873 | 0.740 – 1.030 | 0.1071 |
| PTS | 0.537 | 0.452 – 0.638 | 0.001 |
| GCS | 0.535 | 0.450 – 0.636 | 0.001 |

**Table 3. Multivariable logistic regression analysis of factors associated with life-saving interventions in pediatric trauma patients**

OR: odds ratio, CI: confidence interval, GCS: Glasgow Coma Scale, SIPA Score: Shock Index Pediatric Age-adjusted score, ISS: Injury Severity Score, AIS: Abbreviated Injury Scale, PTS: Pediatric Trauma Score
