# Supplementary material
Source: Research Square preprint supplement (doi:10.21203/rs.3.rs-9271487/v1)
Supplement: Supplementary file 2 [file 63e6cf65e81c34035ca0a41e.docx]

**Table 2. Comparison Of Scores, Laboratory Parameters and Length of Stays Between Patients Requiring And Not Requiring Life-Saving Interventions**

|  | **LSI required**  **(mean±SD)** | **LSI not required**  **(mean±SD)** | **p value** |
| --- | --- | --- | --- |
| **Age, month** | 99.7±70.6 | 101.1±70.1 | 0.827 |
| **AIS** | 3.8±1.4 | 2.2±0.6 | 0.001 |
| **ISS** | 28.8±16.4 | 9.9±5.9 | 0.001 |
| **PTS** | 3.3±3.5 | 9.2±1.7 | 0.001 |
| **BIG Score** | 6.0±5.6 | 3.7±19.4 | 0.188 |
| **SIPA score** | 1.2±0.5 | 1.0±0.2 | 0.001 |
| **GCS** | 7.6±3.8 | 14.1±1.6 | 0.001 |
| **pH** | 7.26±0.53 | 7.39±0.49 | 0.374 |
| **Lactate** | 4.3±5.6 | 2.1±2.8 | 0.001 |
| **Base Deficit** | -5.3±5.3 | -1.9±4.1 | 0.001 |
| **INR** | 2.1±7.9 | 1.5±6.5 | 0.467 |
| **PICU, Length of stay (day)** | 7.4±7.1 | 2.9±2.6 | 0.001 |
| **Total Length of Stay (day)** | 15.6±11.9 | 3.8±4.0 | 0.001 |

**Abbreviations:** AIS, Abbreviated Injury Scale; BIG Score, Base deficit, INR, GCS Score; GCS, Glasgow Coma Scale; INR, International Normalized Ratio; ISS, Injury Severity Score; LSI, Life-Saving Intervention; PICU, Pediatric Intensive Care Unit; PTS, Pediatric Trauma Score; SD, Standard Deviation; SIPA, Shock Index Pediatric Age-Adjusted.
