# Supplementary material
Source: Research Square preprint supplement (doi:10.21203/rs.3.rs-9271487/v1)
Supplement: Supplementary file 3 [file d91b1b3da5c03b57fd4de5c7.docx]

**Table 1. Characteristics of pediatric trauma patients at PED**

|  | n (%) |
| --- | --- |
| **Age** (mean±SD) | 91.4±70.3 |
| **Gender** | |
| Male | 362(64.6) |
| Female | 198(35.4) |
| **Means of arrival** | |
| Emergency Medical Services | 449(80.4) |
| Referred from another hospital (Ambulance) | 91(16.2) |
| Self-presentation (Walk-in) | 19(3.4) |
| **Mechanism of Trauma** | |
| Falls (Accidental, Homicidal, Suicidal) | 248(44.3) |
| Motor Vehicle Accidents | 231(41.3) |
| Bicycle Accident | 30(5.4) |
| Penetrating Trauma | 21(3.8) |
| Blunt Force Trauma | 13(2.3) |
| Assault | 9(1.6) |
| Firearm Injury | 5(0.9) |
| Drowning | 2(0.4) |
| **Time of Arrival Shift** | |
| 08:00-16:00 | 140(25.0) |
| 16:01-23:59 | 312(55.9) |
| 00:00-07:59 | 107(19.1) |
| **ESI Triage Level** | |
| Level 1 | 108(19.3) |
| Level 2 | 176(31.5) |
| Level 3 | 275(49.2) |
| **Body Temperature at Triage** |  |
| Normal | 542(97.0) |
| Hypothermic | 12(2.1) |
| Hyperthermic | 5(0.9) |
| **Heart Rate at Triage** | |
| Normal | 314(56.1) |
| Tachycardia | 211(37.8) |
| Bradycardia | 34(6.1) |
| **Oxygen Saturation at Triage** | |
| Normal | 537(96.0) |
| Hypoxia (Below 92%) | 22(4.0) |
| **Blood Pressure at Triage** | |
| Normal | 448(80.2) |
| Hypotensive for age | 61(10.9) |
| Hypertensive for age | 50(8.9) |
| **Glasgow Coma Scale** | |
| 14-15 | 330(59.1) |
| Between 8-13 | 105(18.8) |
| 8 and below | 124(22.1) |
| **Advanced Imaging** | |
| e-FAST Ultrasonography | 382(68.3) |
| Computed Tomography | 513(91.7) |
| **Life-Saving Interventions** | 179(32.1) |
| Significant Fluid Resuscitation | 156(27.9) |
| Inotropic drug support | 70(12.5) |
| Packed Red Blood Cells Transfusions | 106(18.9) |
| Intubation | 145(25.9) |
| Cardiopulmonary Resuscitation | 19(3.3) |
| **Trauma Team Activation** | |
| Major | 197(35.2) |
| Modified | 325(58.1) |
| Minor - No Activation | 37(6.7) |
| **Mortality** | 29(5.1) |
| **Morbidity** | 57(10.1) |
| **Disposition** | |
| Transfer to PICU | 257(45.9) |
| Transfer to Surgical Observation Unit | 217(38.9) |
| Discharged form PED | 78(13.9) |
| General Pediatric Unit | 7(1.3) |

**Abbreviations:** ESI, Emergency Severity Index; e-FAST, Extended Focused Assessment with Sonography for Trauma; PED, Pediatric Emergency Department; PICU, Pediatric Intensive Care Unit; SD, Standard Deviation.
